# Supplementary material for: A highly selective off–on fluorescent chemodosimeter for Hg2+ based on a anthracene–bis(phosphinesulfide) conjugate
Source: Royal Society of Chemistry journal article supplement (doi:10.1039/c3ra42005a), 2013-01-01
Supplement: c3ra42005a.pdf [file c3ra42005a.pdf]

## Supplementary Information

### A highly selective off-on fluorescent chemodosimeter for Hg<sup>2+</sup> based on a anthracene-bis(phosphinesulfide) conjugate

**Alessandra Garau,<sup>\*a</sup> Pierluigi Caboni,<sup>b</sup> Claudia Caltagirone,<sup>a</sup> Francesco Demartin,<sup>c</sup>  
Francesco Isaia,<sup>\*a</sup> and Vito Lippolis<sup>a</sup>**

<sup>a</sup> Dipartimento di Scienze Chimiche e Geologiche, Università degli Studi di Cagliari, Cittadella Universitaria, 09042 Monserrato (CA), Italy

<sup>b</sup> Dipartimento di Scienze della Vita e dell'Ambiente, Università degli Studi di Cagliari, Italy

<sup>c</sup> Dipartimento di Chimica, Università degli Studi di Milano, via Golgi 19, 20133 Milano, Italy

e-mail: isaia@unica.it

#### Contents:

|              |      |    |
|--------------|------|----|
| 1. Figure S1 | page | S2 |
| 2. Figure S2 |      | S2 |
| 3. Figure S3 |      | S3 |
| 4. Figure S4 |      | S3 |
| 5. Figure S5 |      | S4 |
| 6. Figure S6 |      | S4 |
| 7. Figure S7 |      | S4 |

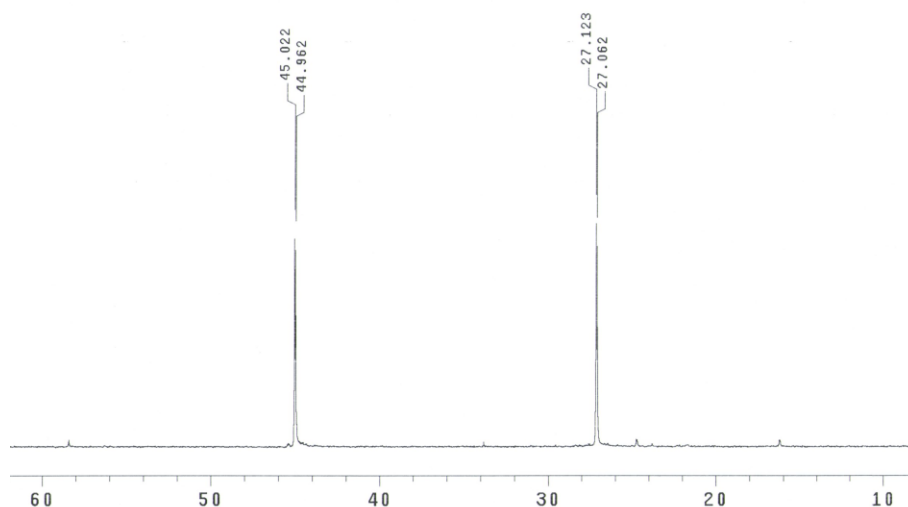

**Figure S1.**  $^{31}\text{P}$  NMR spectrum of  $\text{L}^1$  ( $\delta$  in ppm,  $\text{CDCl}_3$ , 25 °C).

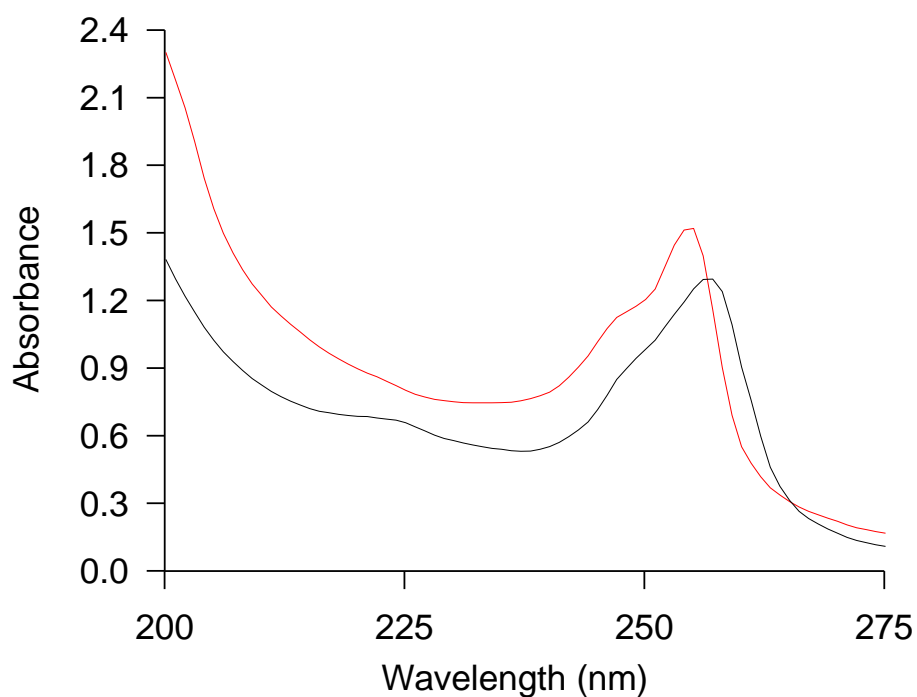

**Figure S2.** UV-Vis spectra of  $\text{L}^1$  (black line) ( $2.79 \times 10^{-5}$  M) and of a solution of  $\text{L}^1$  (red line) in MeCN/ $\text{H}_2\text{O}$  4:1 (v/v), 25 °C, upon addition of  $\text{Hg}^{2+}$  ion, recorded after 1 h ( $[\text{Hg}^{2+}]/[\text{L}^1]$  molar ratio of 0.5).

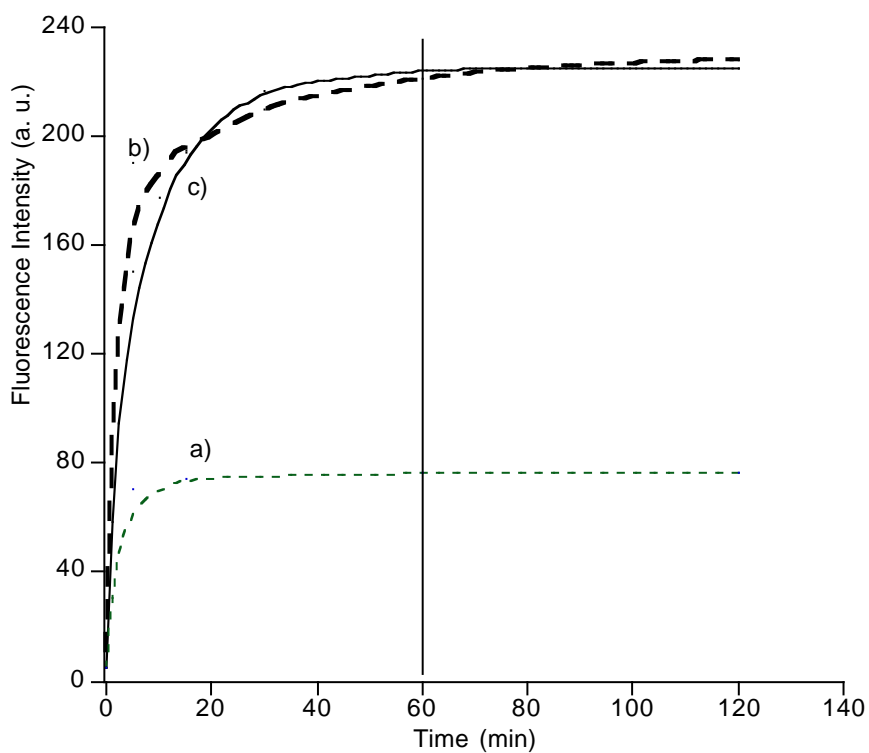

**Figure S3.** Time trace of the fluorescence intensity at 411 nm of the reaction of **L**<sup>1</sup> ( $2.79 \times 10^{-5}$  M) and  $\text{Hg}^{2+}$  at the  $[\text{Hg}^{2+}]/[\text{L}^1]$  molar ratio of a) 0.25; b) 0.5, c) 1. MeCN/ $\text{H}_2\text{O}$  4:1 (v/v), 25 °C,  $\lambda_{\text{ex}} = 376$  nm.

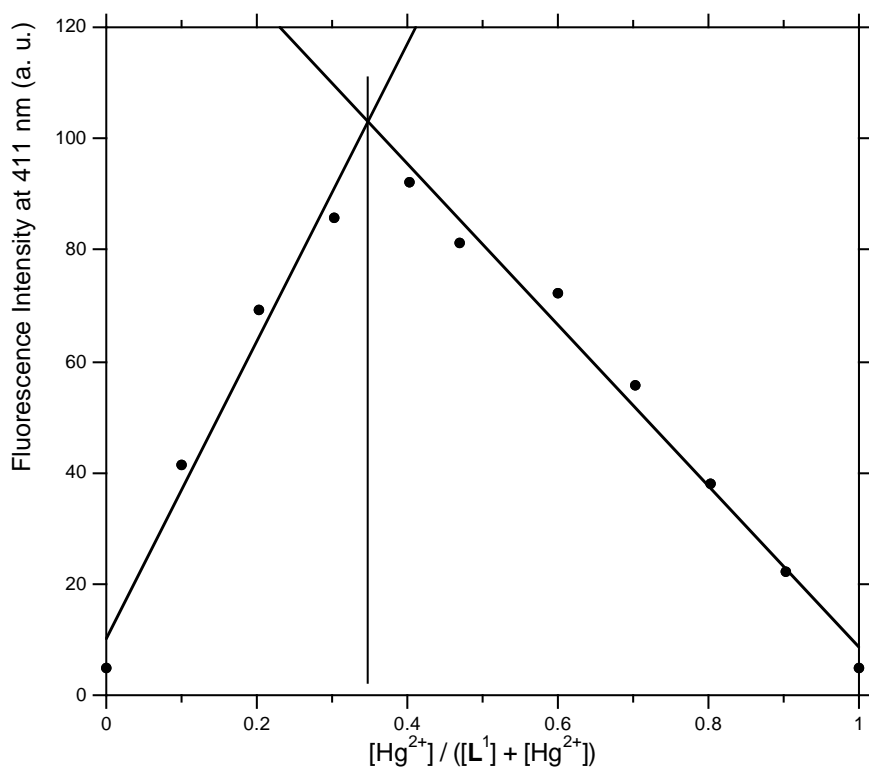

**Figure S4.** Job's plot data for the system  $\text{Hg}^{2+}$  - **L**<sup>1</sup>. The total concentration of **L**<sup>1</sup> and  $\text{Hg}^{2+}$  was  $2.8 \times 10^{-5}$  M. Spectra were measured at 25 °C after 1 h the preparation of solutions.  $\lambda_{\text{ex}} = 376$  nm.

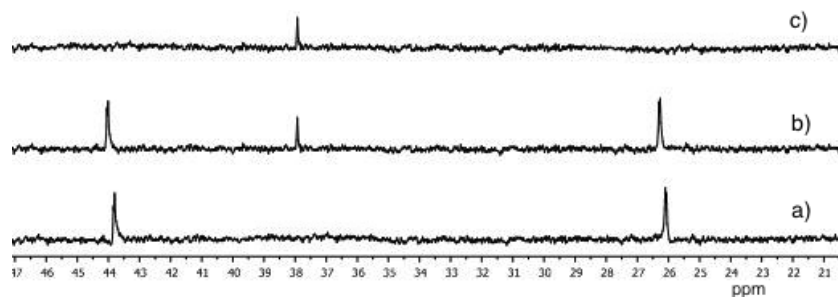

**Figure S5.**  $^{31}\text{P}$  NMR spectra in  $\text{CDCl}_3$  of (a)  $\text{L}^1$  ( $1.35 \times 10^{-3}$  M), and (b) after the addition of  $\text{Hg}(\text{ClO}_4)_2$  in  $\text{CD}_3\text{CN}$  ( $[\text{Hg}^{2+}]/[\text{L}^1]$  molar ratio of 0.5) recorded after 20 min from the mixing, (c) the solution from (b) recorded after 1 h from the mixing;  $\delta$  in ppm, 25 °C).

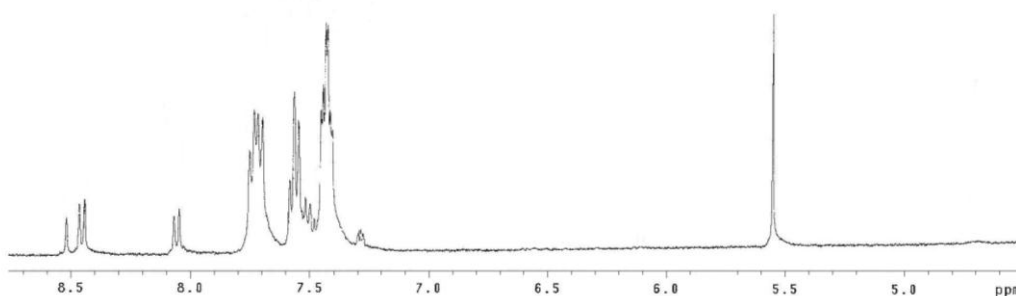

**Figure S6.**  $^1\text{H}$  NMR spectrum of the solution obtained from the reaction of  $\text{L}^1$  in  $\text{CDCl}_3$  ( $1.35 \times 10^{-3}$  M) with  $\text{Hg}(\text{ClO}_4)_2$  in  $\text{CD}_3\text{CN}$  ( $[\text{Hg}^{2+}]/[\text{L}^1]$  molar ratio of 0.5.) after the separation of the solid complex  $[\text{HgL}_2]$ ;  $\delta$  in ppm, 25 °C).

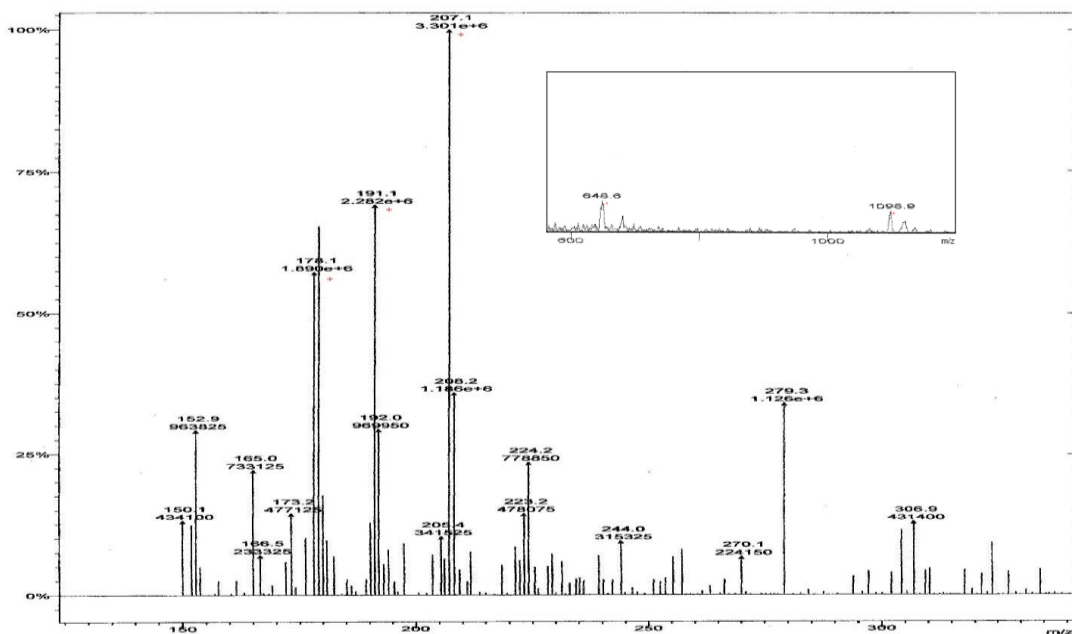

**Figure S7.** Atmospheric Pressure Chemical Ionisation Mass (APCI) spectrum of  $\text{L}^1$  ( $4.35 \times 10^{-7}$  M) in MeCN upon addition of  $\text{Hg}^{2+}$  ion.  $[\text{Hg}^{2+}]/[\text{L}^1]$  molar ratio of 0.5. Spectrum recorded after 1 h from the mixing.
